# Supplementary material for: Epidemiological, Genetic, and Phenotypic Characteristics of Non-Typhoidal Salmonella in Young Children, as Obtained from a Tertiary Hospital in Guangzhou, China
Source: MDPI journal article supplement (doi:10.3390/microorganisms11102433), 2023-09-28
Supplement: s1 [file s1]

**Table S1.** Assessment of possible risk factors for NTS infection (N = 465).

| Variable                                                  |                                | Examined no. | Positive no. (%) | OR (95% CI) <sup>a</sup> | $\chi^2$ / p value                |
|-----------------------------------------------------------|--------------------------------|--------------|------------------|--------------------------|-----------------------------------|
| Gender                                                    | Male                           | 289          | 96 (33.22)       | 0.790 (0.535, 1.167)     | 1.407/ 0.236                      |
|                                                           | Female                         | 176          | 68 (38.64)       |                          |                                   |
| Age (years)                                               | Infants (0–1)                  | 237          | 85 (35.86 )      | 0.948 (0.648, 1.387)     | 0.075/ 0.784                      |
|                                                           | Children (2–5)                 | 228          | 79 (34.65)       |                          |                                   |
| Residence                                                 | Urban                          | 224          | 80 (35.71)       | 1.038 (0.710, 1.519)     | 0.038/ 0.846                      |
|                                                           | Village                        | 241          | 84 (34.85)       |                          |                                   |
| Infant and child feeding                                  | Breastfeeding                  | 37           | 4 (10.81)        | ref                      |                                   |
|                                                           | Artificial feeding             | 299          | 123 (41.14)      | 5.776 (1.992, 16.691)    | <b>12.880/ 0.0003<sup>b</sup></b> |
|                                                           | Both                           | 75           | 28 (37.33)       | 4.915 (1.575, 15.341)    | <b>8.540/ 0.003<sup>b</sup></b>   |
| Type of powdered milk                                     | Domestic                       | 175          | 68 (38.86)       | 0.888 (0.587, 1.344)     | 0.314/ 0.575                      |
|                                                           | Imported                       | 199          | 83 (41.71)       |                          |                                   |
| Preservation of complementary food                        | Refrigerated                   | 24           | 10 (41.67)       | 0.790 (0.337, 1.850)     | 0.295/0.587                       |
|                                                           | Room temperature               | 74           | 43 (58.11)       | 0.407 (0.240, 0.690)     | <b>11.504/ 0.001<sup>b</sup></b>  |
|                                                           | Cook for immediate consumption | 255          | 92 (36.08 )      | ref                      |                                   |
| Eating unwashed vegetables and fruits                     | Yes                            | 14           | 2 (14.29)        | 1.273 (0.231, 7.000)     | 0/ 1.000                          |
|                                                           | No                             | 40           | 7 (17.50)        |                          |                                   |
| Separate chopping boards for handling raw and cooked food | Yes                            | 24           | 2 (8.33)         | 3.348 (0.626, 17.903)    | 1.215/ 0.270                      |
|                                                           | No                             | 30           | 7 (23.33)        |                          |                                   |
| Washing hands before meals                                | Yes                            | 389          | 132 (33.93)      | 1.416 (0.858, 2.338)     | 1.860/ 0.173                      |
|                                                           | No                             | 76           | 32 (42.11)       |                          |                                   |
| Washing hands after using toilets                         | Yes                            | 413          | 139 (33.66)      | 1.825 (1.021, 3.263)     | <b>4.207/ 0.04<sup>b</sup></b>    |
|                                                           | No                             | 52           | 25 (48.08)       |                          |                                   |

|                                 |                                       |     |             |                      |              |
|---------------------------------|---------------------------------------|-----|-------------|----------------------|--------------|
| Contact with animals frequently | Yes                                   | 54  | 22 (40.74)  | 0.768 (0.430, 1.371) | 0.801/ 0.371 |
|                                 | No                                    | 411 | 142 (34.55) |                      |              |
| Animal species <sup>c</sup>     | Poultry (eg. chickens and ducks)      | 22  | 10 (45.45)  | ref                  |              |
|                                 | Companion animals (eg. dogs and cats) | 33  | 15 (45.45)  | 1.000 (0.338, 2.955) | 0/ 1.000     |
|                                 | Others (eg. reptiles and birds)       | 5   | 0           | 1.833 (1.252, 2.685) | –/ 0.124     |
| Nutritional status              | Good                                  | 447 | 156 (34.90) | ref                  |              |
|                                 | Fair                                  | 11  | 5 (45.45)   | 1.554 (0.467, 5.175) | 0.525/ 0.469 |
|                                 | Poor                                  | 7   | 3 (42.86)   | 0.715 (0.158, 3.234) | 0.192/ 0.661 |

<sup>a</sup>*CI, confidence interval.*

<sup>b</sup>*Bold type for values indicates statistical significance.*

<sup>c</sup>*Six children (including three NTS-positive children) are frequently exposed to both poultry and companion animals.*

**Table S2.** Relationship between NTS infection and clinical symptoms.

| Variable                       |     | All participants |                  |                          |                                    |
|--------------------------------|-----|------------------|------------------|--------------------------|------------------------------------|
|                                |     | Examined no.     | Positive no. (%) | OR (95% CI) <sup>b</sup> | $\chi^2$ / p value                 |
| Clinical symptoms <sup>a</sup> | Yes | 268              | 95 (35.45)       | 1.019 (0.693, 1.497)     | 0.009/ 0.925                       |
|                                | No  | 197              | 69 (35.03)       |                          |                                    |
| Diarrhea                       | Yes | 191              | 68 (35.60)       | 1.025 (0.697, 1.509)     | 0.016/ 0.900                       |
|                                | No  | 274              | 96 (35.04)       |                          |                                    |
| Abdominal pain                 | Yes | 27               | 6 (22.22)        | 0.506 (0.200, 1.281)     | 2.137/ 0.144                       |
|                                | No  | 438              | 158 (36.07)      |                          |                                    |
| Nausea                         | Yes | 10               | 4 (40.00)        | 1.229 (0.342, 4.420)     | 0/ 1.000                           |
|                                | No  | 455              | 160 (35.16)      |                          |                                    |
| Emesis                         | Yes | 37               | 16 (43.24)       | 1.441 (0.730, 2.846)     | 1.120/ 0.290                       |
|                                | No  | 428              | 148 (34.58)      |                          |                                    |
| Fever                          | Yes | 147              | 71 (48.30)       | 2.260 (1.509, 3.385)     | <b>15.987/ 0.00006<sup>c</sup></b> |
|                                | No  | 318              | 93 (29.25)       |                          |                                    |
| Cough                          | Yes | 68               | 23 (33.82)       | 0.928 (0.539, 1.597)     | 0.073/ 0.787                       |
|                                | No  | 397              | 141 (35.52)      |                          |                                    |

<sup>a</sup>Indicating people who had at least one of the six symptoms listed in the present study.

<sup>b</sup>CI, confidence interval.

<sup>c</sup>Bold type for values indicates statistical significance.

**Table S3. Antimicrobial resistance pattern of ST34 (N = 103) and ST19 (N = 28) strains, respectively.**

| Antimicrobial | ST34 |      |      | ST19 |      |      | Total <sup>a</sup> |      |      |
|---------------|------|------|------|------|------|------|--------------------|------|------|
|               | R %  | I %  | S %  | R %  | I %  | S %  | R %                | I %  | S %  |
| AMC           | 1.9  | 6.8  | 91.3 | 17.9 | 3.6  | 78.6 | 5.3                | 6.1  | 88.6 |
| AZM           | 2.9  | 27.2 | 69.9 | 3.6  | 17.9 | 78.6 | 3.8                | 25   | 71.2 |
| AMP           | 88.3 | 1    | 10.7 | 89.3 | 3.6  | 7.1  | 88.6               | 1.5  | 9.8  |
| ETP           | 0    | 0    | 100  | 0    | 0    | 100  | 0                  | 0    | 100  |
| SXT           | 32   | 0    | 68   | 85.7 | 0    | 14.3 | 43.9               | 0    | 56.1 |
| CIP           | 5.8  | 48.5 | 45.6 | 3.6  | 82.1 | 14.3 | 5.3                | 56.1 | 38.6 |
| CHL           | 39.8 | 0    | 60.2 | 92.9 | 0    | 7.1  | 50.8               | 0    | 49.2 |
| TZP           | 0    | 0    | 100  | 0    | 3.6  | 96.4 | 0                  | 0.8  | 99.2 |
| TCY           | 96.1 | 0    | 3.9  | 75   | 3.6  | 21.4 | 91.7               | 0.8  | 7.6  |
| TGC           | 0    | 8.7  | 91.3 | 0    | 0    | 100  | 0                  | 6.8  | 93.2 |
| FEP           | 2.9  | 2.9  | 94.2 | 0    | 0    | 100  | 3                  | 2.3  | 94.7 |
| CXM           | 10.7 | 1    | 88.3 | 14.3 | 0    | 85.7 | 12.1               | 0.8  | 87.1 |
| CXA           | 10.7 | 1.9  | 87.4 | 14.3 | 0    | 85.7 | 12.1               | 1.5  | 86.4 |
| CRO           | 11.7 | 0    | 88.3 | 14.3 | 0    | 85.7 | 12.9               | 0    | 87.1 |
| CAZ           | 9.7  | 0    | 90.3 | 14.3 | 0    | 85.7 | 11.4               | 0    | 88.6 |
| FOX           | 1.9  | 0    | 98.1 | 14.3 | 0    | 85.7 | 4.5                | 0    | 95.5 |
| IPM           | 0    | 0    | 100  | 0    | 0    | 100  | 0                  | 0    | 100  |
| LVX           | 0    | 4.9  | 95.1 | 0    | 0    | 100  | 0                  | 3.8  | 96.2 |
| CSL           | 0    | 1.9  | 98.1 | 0    | 0    | 100  | 0                  | 1.5  | 98.5 |

R: Resistant; I: Intermediate; S: Susceptible

<sup>a</sup>Total includes all *S. 1*, *S. 4*, *S. 12:i:-* and *S. Typhimurium* strains, which are further divided into ST19, ST34, and a novel ST.
