# Supplementary material for: Epidemiological, Genetic, and Phenotypic Characteristics of Non-Typhoidal Salmonella in Young Children, as Obtained from a Tertiary Hospital in Guangzhou, China
Source: Microorganisms. 2023 Sep 28;11(10):2433. doi: 10.3390/microorganisms11102433 (PMC10609151; doi:10.3390/microorganisms11102433)
Supplement: Supplementary file 1 [file microorganisms-11-02433-s001.zip › Supplementary Excels S1-S3.xls]

## Sheet: Excel S1
Excel S1. Distribution of resistance genes among different STs.
Resistance genes	ST19	ST34	Other ST	Total
aac(2')-IIa	0	1	0	1
aac(3)-IId	1	1	1	3
aac(3)-IIe	0	1	0	1
aac(3)-IVa	1	14	2	17
aac(6')-Ib-cr5	0	2	0	2
aac(6')-Ib-D181Y	0	11	2	13
aadA1	24	7	10	41
aadA16	0	8	1	9
aadA2	24	8	8	40
aadA22	0	4	0	4
aadA5	0	0	2	2
aadA8	0	0	1	1
aph(3'')-Ib	1	94	5	100
aph(3')-Ia	0	15	2	17
aph(4)-Ia	1	13	2	16
aph(6)-Id	1	95	5	101
arr-2	0	10	1	11
arr-3	0	9	3	12
blaCARB-2	0	0	1	1
blaCMY-2	4	3	0	7
blaCTX-M-14	0	1	0	1
blaCTX-M-55	0	5	0	5
blaCTX-M-64	0	0	1	1
blaCTX-M-65	0	5	0	5
blaDHA-17	0	0	1	1
blaEC-18	0	1	0	1
blaEC-8	0	2	0	2
blaLAP-2	0	1	0	1
blaMIR-11	0	1	0	1
blaNDM-5	0	1	0	1
blaOXA-1	0	3	1	4
blaOXA-10	0	11	1	12
blaTEM-1	23	72	16	111
blaTEM-238	1	0	0	1
bleMBL	0	1	0	1
bleO	1	4	0	5
catA2	0	0	1	1
catB3	0	3	1	4
cmlA1	25	6	9	40
cmlA5	0	5	1	6
cmlA6	0	1	0	1
dfrA1	0	0	1	1
dfrA12	24	3	10	37
dfrA14	0	25	1	26
dfrA17	0	0	2	2
dfrA27	0	8	2	10
dfrA8	1	0	0	1
erm(B)	0	2	0	2
floR	26	40	14	80
fosA	0	1	0	1
fosA3	0	1	0	1
fosA7.3	0	0	8	8
lnu(F)	1	11	1	13
mcr-10.1	0	1	0	1
mph(A)	0	5	2	7
oqxA	1	4	0	5
oqxB	1	3	0	4
qnrB6	0	4	1	5
qnrS1	22	30	12	64
qnrS2	0	0	2	2
qnrVC1	0	2	0	2
rmtB1	0	1	0	1
sul1	0	11	3	14
sul2	26	97	15	138
sul3	23	10	11	44
tet(A)	20	19	16	55
tet(B)	1	87	1	89
tet(G)	0	0	1	1
tet(M)	26	2	9	37

## Sheet: Excel S2
Excel S2. Antibiotic resistance genes in each strain.
Strain No.	No. of ARGs	aac(2')-IIa	aac(3)-IId	aac(3)-IIe	aac(3)-IVa	aac(6')-Ib-D181Y	aac(6')-Ib-cr5	aadA1	aadA16	aadA2	aadA22	aadA5	aadA8	aph(3'')-Ib	aph(3')-Ia	aph(4)-Ia	aph(6)-Id	arr-2	arr-3	blaCARB-2	blaCMY-2	blaCTX-M-14	blaCTX-M-55	blaCTX-M-64	blaCTX-M-65	blaDHA-17	blaEC-18	blaEC-8	blaLAP-2	blaMIR-11	blaNDM-5	blaOXA-1	blaOXA-10	blaTEM-1	blaTEM-238	bleMBL	bleO	catA2	catB3	cmlA1	cmlA5	cmlA6	dfrA1	dfrA12	dfrA14	dfrA17	dfrA27	dfrA8	erm(B)
1101-1	10	-	-	-	-	-	-	100	-	100	-	-	-	-	-	-	-	-	-	-	-	-	-	-	-	-	-	-	-	-	-	-	-	100	-	-	-	-	-	100	-	-	-	100	-	-	-	-	-
1101-10	10	-	-	-	-	-	-	100	-	100	-	-	-	-	-	-	-	-	-	-	-	-	-	-	-	-	-	-	-	-	-	-	-	100	-	-	-	-	-	100	-	-	-	100	-	-	-	-	-
1101-100	5	-	-	-	-	-	-	-	-	-	-	-	-	100	-	-	100	-	-	-	-	-	-	-	-	-	-	-	-	-	-	-	-	100	-	-	-	-	-	-	-	-	-	-	-	-	-	-	-
1101-11	10	-	-	-	-	-	-	100	-	100	-	-	-	-	-	-	-	-	-	-	-	-	-	-	-	-	-	-	-	-	-	-	-	100	-	-	-	-	-	100	-	-	-	100	-	-	-	-	-
1101-12	8	-	-	-	-	-	-	-	100	-	-	-	-	-	-	-	-	-	100	-	-	-	-	100	-	-	-	-	-	-	-	-	-	-	-	-	-	-	-	-	-	-	-	-	-	-	100	-	-
1101-13	12	-	-	-	-	-	-	98.61	-	100	-	-	-	100	-	-	100	100	-	-	-	-	-	-	-	-	-	-	-	-	-	-	100	-	-	-	-	-	-	100	-	-	-	-	100	-	-	-	-
1101-14	7	-	-	-	-	-	-	-	-	-	-	-	-	100	-	-	100	-	-	-	100	-	-	-	-	-	-	100	-	-	-	-	-	100	-	-	-	-	-	-	-	-	-	-	-	-	-	-	-
1101-17	8	-	-	-	-	-	-	-	-	-	-	-	-	100	-	-	100	-	-	-	-	-	-	-	-	-	-	-	-	-	-	-	-	100	-	-	-	-	-	-	-	-	-	-	100	-	-	-	-
1101-19	13	-	-	-	100	-	-	-	-	-	-	-	-	100	100	100	100	100	-	-	-	-	-	-	100	-	-	-	-	-	-	-	100	-	-	-	-	-	-	-	100	-	-	-	100	-	-	-	-
1101-27	5	-	-	-	-	-	-	-	-	-	-	-	-	100	-	-	100	-	-	-	-	-	-	-	-	-	-	-	-	-	-	-	-	-	-	-	-	-	-	-	-	-	-	-	-	-	-	-	-
1101-32	0	-	-	-	-	-	-	-	-	-	-	-	-	-	-	-	-	-	-	-	-	-	-	-	-	-	-	-	-	-	-	-	-	-	-	-	-	-	-	-	-	-	-	-	-	-	-	-	-
1101-33	10	-	-	-	-	-	-	-	-	-	-	-	-	100	-	-	100	-	-	-	-	-	100	-	-	-	-	-	-	-	-	-	-	100	-	-	-	-	-	-	-	-	-	-	100	-	-	-	-
1101-36	0	-	-	-	-	-	-	-	-	-	-	-	-	-	-	-	-	-	-	-	-	-	-	-	-	-	-	-	-	-	-	-	-	-	-	-	-	-	-	-	-	-	-	-	-	-	-	-	-
1101-38	11	-	-	-	-	-	-	100	-	100	-	-	-	-	-	-	-	-	-	-	-	-	-	-	-	-	-	-	-	-	-	-	-	-	100	-	-	-	-	100	-	-	-	100	-	-	-	-	-
1101-39	5	-	-	-	-	-	-	-	-	-	-	-	-	100	-	-	100	-	-	-	-	-	-	-	-	-	-	-	-	-	-	-	-	100	-	-	-	-	-	-	-	-	-	-	-	-	-	-	-
1101-43	4	-	-	-	-	-	-	-	-	-	-	-	-	100	-	-	100	-	-	-	-	-	-	-	-	-	-	-	-	-	-	-	-	-	-	-	-	-	-	-	-	-	-	-	-	-	-	-	-
1101-45	5	-	-	-	-	-	-	-	-	-	-	-	-	100	-	-	100	-	-	-	-	-	-	-	-	-	-	-	-	-	-	-	-	100	-	-	-	-	-	-	-	-	-	-	-	-	-	-	-
1101-47	0	-	-	-	-	-	-	-	-	-	-	-	-	-	-	-	-	-	-	-	-	-	-	-	-	-	-	-	-	-	-	-	-	-	-	-	-	-	-	-	-	-	-	-	-	-	-	-	-
1101-48	5	-	-	-	-	-	-	-	-	-	-	-	-	100	-	-	100	-	-	-	-	-	-	-	-	-	-	-	-	-	-	-	-	100	-	-	-	-	-	-	-	-	-	-	-	-	-	-	-
1101-49	5	-	-	-	-	-	-	-	-	-	-	-	-	100	-	-	100	-	-	-	-	-	-	-	-	-	-	-	-	-	-	-	-	100	-	-	-	-	-	-	-	-	-	-	-	-	-	-	-
1101-51	7	-	-	-	-	-	-	-	-	-	-	-	-	-	-	-	-	-	-	-	-	-	-	-	-	-	-	-	-	-	-	-	-	100	-	-	-	-	-	-	-	-	-	-	-	-	-	-	-
1101-54	8	-	-	-	-	-	-	-	-	-	-	-	-	100	99.75	-	100	-	-	-	-	-	-	-	-	-	-	-	-	-	-	-	-	100	-	-	-	-	-	-	-	-	-	-	96.84	-	-	-	-
1101-55	5	-	-	-	-	-	-	-	-	-	-	-	-	100	-	-	100	-	-	-	-	-	-	-	-	-	-	-	-	-	-	-	-	100	-	-	-	-	-	-	-	-	-	-	-	-	-	-	-
1101-58	5	-	-	-	-	-	-	-	-	-	-	-	-	100	-	-	100	-	-	-	-	-	-	-	-	-	-	-	-	-	-	-	-	100	-	-	-	-	-	-	-	-	-	-	-	-	-	-	-
1101-59	10	-	-	-	-	-	-	100	-	100	-	-	-	-	-	-	-	-	-	-	-	-	-	-	-	-	-	-	-	-	-	-	-	100	-	-	-	-	-	100	-	-	-	100	-	-	-	-	-
1101-6	8	-	-	-	-	-	-	-	-	-	-	-	-	100	-	-	100	-	-	-	-	-	-	-	-	-	-	-	-	-	-	-	-	100	-	-	-	-	-	-	-	-	-	-	100	-	-	-	-
1101-60	8	-	-	-	-	-	-	-	-	-	-	-	-	100	-	-	100	-	-	-	-	-	-	-	-	-	-	-	-	-	-	-	-	100	-	-	-	-	-	-	-	-	-	-	100	-	-	-	-
1101-61	6	-	-	-	-	-	-	-	-	-	-	-	-	100	-	-	100	-	-	-	-	-	-	-	-	-	-	-	-	-	-	-	-	100	-	-	-	-	-	-	-	-	-	-	-	-	-	-	-
1101-67	16	-	-	-	100	100	-	100	-	-	-	-	-	-	-	100	-	-	-	-	-	-	-	-	-	-	-	-	-	-	-	100	-	-	-	-	96.79	-	100	100	-	-	-	100	-	-	-	-	-
1101-68	5	-	-	-	-	-	-	-	-	-	-	-	-	100	-	-	100	-	-	-	-	-	-	-	-	-	-	-	-	-	-	-	-	100	-	-	-	-	-	-	-	-	-	-	-	-	-	-	-
1101-7	5	-	-	-	-	-	-	-	-	-	-	-	-	100	-	-	100	-	-	-	-	-	-	-	-	-	-	-	-	-	-	-	-	-	-	-	-	-	-	-	-	-	-	-	-	-	-	-	-
1101-71	15	-	-	-	100	-	-	-	-	-	-	-	-	100	100	100	100	100	-	-	-	-	-	-	100	-	-	-	-	-	-	-	100	-	-	-	-	-	-	-	100	-	-	-	100	-	-	-	-
1101-74	5	-	-	-	-	-	-	-	-	-	-	-	-	100	-	-	100	-	-	-	-	-	-	-	-	-	-	-	-	-	-	-	-	100	-	-	-	-	-	-	-	-	-	-	-	-	-	-	-
1101-77	8	-	-	-	-	-	-	-	-	-	-	-	-	100	-	-	100	-	-	-	-	-	100	-	-	-	-	-	-	-	-	-	-	100	-	-	-	-	-	-	-	-	-	-	100	-	-	-	-
1101-79	5	-	-	-	-	-	-	-	-	-	-	-	-	100	-	-	100	-	-	-	-	-	-	-	-	-	-	-	-	-	-	-	-	100	-	-	-	-	-	-	-	-	-	-	-	-	-	-	-
1101-8	12	-	-	-	-	100	-	-	100	-	-	-	-	100	-	-	100	-	100	-	-	-	-	-	-	-	-	-	-	-	-	-	-	100	-	-	-	-	-	-	-	-	-	-	-	-	100	-	-
1101-81	15	-	-	-	100	100	-	100	-	100	-	-	-	-	-	100	-	-	-	-	-	-	-	-	-	-	-	-	-	-	-	100	-	-	-	-	96.79	-	100	100	-	-	-	-	-	-	-	-	-
1101-82	0	-	-	-	-	-	-	-	-	-	-	-	-	-	-	-	-	-	-	-	-	-	-	-	-	-	-	-	-	-	-	-	-	-	-	-	-	-	-	-	-	-	-	-	-	-	-	-	-
1101-83	4	-	-	-	-	-	-	-	-	-	-	-	-	100	-	-	100	-	-	-	-	-	-	-	-	-	-	-	-	-	-	-	-	-	-	-	-	-	-	-	-	-	-	-	-	-	-	-	-
1101-84	12	-	-	-	-	-	-	100	-	100	-	-	-	-	-	-	-	-	-	-	100	-	-	-	-	-	-	-	-	-	-	-	-	100	-	-	-	-	-	100	-	-	-	100	-	-	-	-	-
1101-87	11	-	-	-	-	-	-	100	-	100	-	-	-	-	-	-	-	-	-	-	-	-	-	-	-	-	-	-	-	-	-	-	-	100	-	-	-	-	-	100	-	-	-	100	-	-	-	-	-
1101-88	8	-	-	-	-	-	-	-	-	-	-	-	-	-	-	-	-	-	-	-	-	-	100	-	-	-	100	-	-	95.9	-	-	-	86.06	-	-	-	-	-	-	-	-	-	-	-	-	-	-	-
1101-89	8	-	-	-	-	-	-	-	-	-	-	-	-	100	-	-	100	-	-	-	-	-	-	-	-	-	-	-	-	-	-	-	-	100	-	-	-	-	-	-	-	-	-	-	100	-	-	-	-
1101-9	0	-	-	-	-	-	-	-	-	-	-	-	-	-	-	-	-	-	-	-	-	-	-	-	-	-	-	-	-	-	-	-	-	-	-	-	-	-	-	-	-	-	-	-	-	-	-	-	-
1101-90	12	-	-	-	-	100	-	-	100	-	-	-	-	100	-	-	100	-	100	-	-	-	-	-	-	-	-	-	-	-	-	-	-	100	-	-	-	-	-	-	-	-	-	-	-	-	100	-	-
1101-91	4	-	-	-	-	-	-	-	-	-	-	-	-	-	-	-	-	-	-	100	-	-	-	-	-	-	-	-	-	-	-	-	-	-	-	-	-	-	-	-	-	-	100	-	-	-	-	-	-
1101-93	9	-	-	-	-	-	-	-	-	-	-	-	-	100	-	-	100	-	-	-	-	-	-	-	-	-	-	-	-	-	-	-	-	100	-	-	-	-	-	-	-	-	-	-	100	-	-	-	-
1101-95	7	-	-	-	-	-	-	100	-	-	-	-	-	-	-	-	-	-	-	-	-	-	-	-	-	-	-	-	-	-	-	-	-	100	-	-	-	-	-	100	-	-	-	-	-	-	-	-	-
1101-96	4	-	-	-	-	-	-	-	-	-	-	-	-	100	-	-	100	-	-	-	-	-	-	-	-	-	-	-	-	-	-	-	-	-	-	-	-	-	-	-	-	-	-	-	-	-	-	-	-
1101-97	5	-	-	-	-	-	-	-	-	-	-	-	-	100	-	-	100	-	-	-	-	-	-	-	-	-	-	-	-	-	-	-	-	100	-	-	-	-	-	-	-	-	-	-	-	-	-	-	-
1102-11	4	-	-	-	-	-	-	-	-	-	-	-	-	100	-	-	100	-	-	-	-	-	-	-	-	-	-	-	-	-	-	-	-	100	-	-	-	-	-	-	-	-	-	-	-	-	-	-	-
1102-12	2	-	-	-	-	-	-	-	-	-	-	-	-	-	-	-	-	-	-	-	-	-	-	-	-	-	-	-	-	-	-	-	-	100	-	-	-	-	-	-	-	-	-	-	-	-	-	-	-
1102-13	13	-	-	-	-	-	100	100	-	-	-	-	-	100	-	-	100	-	-	-	100	-	-	-	-	-	-	-	-	-	-	-	100	-	-	-	-	-	-	-	-	-	-	-	100	-	-	-	-
1102-16	8	-	-	-	-	-	-	-	-	-	-	-	-	100	-	-	100	-	-	-	-	-	-	-	-	-	-	-	-	-	-	-	-	100	-	-	-	-	-	-	-	-	-	-	100	-	-	-	-
1102-17	5	-	-	-	-	-	-	-	-	-	-	-	-	100	-	-	100	-	-	-	-	-	-	-	-	-	-	-	-	-	-	-	-	100	-	-	-	-	-	-	-	-	-	-	-	-	-	-	-
1102-18	7	-	-	-	-	-	-	-	-	-	-	-	100	-	-	-	-	-	-	-	-	-	-	-	-	-	-	-	-	-	-	-	-	100	-	-	-	-	-	-	-	-	-	100	-	-	-	-	-
1102-22	5	-	-	-	-	-	-	-	-	-	-	-	-	100	-	-	100	-	-	-	-	-	-	-	-	-	-	-	-	-	-	-	-	100	-	-	-	-	-	-	-	-	-	-	-	-	-	-	-
1102-26	2	-	-	-	-	-	-	-	-	-	-	-	-	-	-	-	-	-	-	-	-	-	-	-	-	-	-	-	-	-	-	-	-	-	-	-	-	-	-	-	-	-	-	-	-	-	-	-	-
1102-27	5	-	-	-	-	-	-	-	-	-	-	-	-	100	-	-	100	-	-	-	-	-	-	-	-	-	-	-	-	-	-	-	-	100	-	-	-	-	-	-	-	-	-	-	-	-	-	-	-
1102-31	5	-	-	-	-	-	-	-	-	-	-	-	-	100	-	-	100	-	-	-	-	-	-	-	-	-	-	-	-	-	-	-	-	100	-	-	-	-	-	-	-	-	-	-	-	-	-	-	-
1102-34	9	-	-	-	-	-	-	-	-	-	-	-	-	100	-	-	100	-	-	-	-	-	-	-	-	-	-	-	-	-	-	-	-	100	-	-	-	-	-	-	-	-	-	-	100	-	-	-	-
1102-38	11	-	-	-	-	-	-	100	-	100	-	-	-	-	-	-	-	-	-	-	-	-	-	-	-	-	-	-	-	-	-	-	-	100	-	-	-	-	-	100	-	-	-	100	-	-	-	-	-
1102-39	12	100	-	-	100	-	-	-	-	-	-	-	-	-	100	-	-	-	-	-	-	100	-	-	-	-	-	-	-	-	-	-	-	-	-	-	96.79	-	-	-	-	-	-	-	-	-	-	-	-
1102-40	17	-	-	100	-	-	-	100	-	100	-	-	-	100	100	-	100	-	-	-	-	-	-	-	-	-	-	100	-	-	-	-	-	100	-	-	-	-	-	100	-	-	-	100	-	-	-	-	100
1102-41	2	-	-	-	-	-	-	-	-	-	-	-	-	-	-	-	-	-	-	-	-	-	-	-	-	-	-	-	-	-	-	-	-	100	-	-	-	-	-	-	-	-	-	-	-	-	-	-	-
1102-42	4	-	-	-	-	-	-	-	-	-	-	-	-	100	-	-	100	-	-	-	-	-	-	-	-	-	-	-	-	-	-	-	-	-	-	-	-	-	-	-	-	-	-	-	-	-	-	-	-
1102-43	4	-	-	-	-	-	-	-	-	-	-	-	-	100	-	-	100	-	-	-	-	-	-	-	-	-	-	-	-	-	-	-	-	-	-	-	-	-	-	-	-	-	-	-	-	-	-	-	-
1102-44	12	-	-	-	-	-	-	100	-	100	-	-	-	-	-	-	-	-	-	-	100	-	-	-	-	-	-	-	-	-	-	-	-	100	-	-	-	-	-	100	-	-	-	100	-	-	-	-	-
1102-46	4	-	-	-	-	-	-	-	-	-	-	-	-	100	-	-	100	-	-	-	-	-	-	-	-	-	-	-	-	-	-	-	-	-	-	-	-	-	-	-	-	-	-	-	-	-	-	-	-
1102-48	4	-	-	-	-	-	-	-	-	-	-	-	-	100	-	-	100	-	-	-	-	-	-	-	-	-	-	-	-	-	-	-	-	100	-	-	-	-	-	-	-	-	-	-	-	-	-	-	-
1102-49	5	-	-	-	-	-	-	-	-	-	-	-	-	100	-	-	100	-	-	-	-	-	-	-	-	-	-	-	-	-	-	-	-	100	-	-	-	-	-	-	-	-	-	-	-	-	-	-	-
1102-50	14	-	-	-	-	-	-	-	-	100	-	-	-	100	-	-	100	-	-	-	-	-	-	-	-	-	-	-	-	-	-	-	-	100	-	-	-	-	-	100	-	-	-	100	-	-	-	100	-
1102-51	0	-	-	-	-	-	-	-	-	-	-	-	-	-	-	-	-	-	-	-	-	-	-	-	-	-	-	-	-	-	-	-	-	-	-	-	-	-	-	-	-	-	-	-	-	-	-	-	-
1102-53	5	-	-	-	-	-	-	-	-	-	-	-	-	100	-	-	100	-	-	-	-	-	-	-	-	-	-	-	-	-	-	-	-	100	-	-	-	-	-	-	-	-	-	-	-	-	-	-	-
1102-54	17	-	-	-	100	100	-	100	-	-	-	-	-	-	100	100	-	-	100	-	-	-	-	-	-	-	-	-	-	-	-	100	-	-	-	-	-	-	100	100	-	-	-	100	-	-	-	-	-
1102-56	11	-	-	-	-	100	-	-	100	-	-	-	-	100	-	-	100	-	100	-	-	-	-	-	-	-	-	-	-	-	-	-	-	100	-	-	-	-	-	-	-	-	-	-	-	-	100	-	-
1102-57	17	-	100	-	-	-	-	-	-	-	100	-	-	-	100	-	100	100	-	-	-	-	100	-	-	-	-	-	100	-	-	-	-	100	-	-	-	-	-	-	-	-	-	-	100	-	-	-	-
1102-59	11	-	-	-	-	-	-	100	-	100	-	-	-	-	-	-	-	-	-	-	-	-	-	-	-	-	-	-	-	-	-	-	-	100	-	-	-	-	-	100	-	-	-	100	-	-	-	-	-
1102-60	6	-	-	-	-	-	-	100	-	100	-	-	-	-	-	-	-	-	-	-	-	-	-	-	-	-	-	-	-	-	-	-	-	-	-	-	-	-	-	100	-	-	-	100	-	-	-	-	-
1102-61	0	-	-	-	-	-	-	-	-	-	-	-	-	-	-	-	-	-	-	-	-	-	-	-	-	-	-	-	-	-	-	-	-	-	-	-	-	-	-	-	-	-	-	-	-	-	-	-	-
1102-62	11	-	-	-	-	-	-	100	-	100	-	-	-	-	-	-	-	-	-	-	-	-	-	-	-	-	-	-	-	-	-	-	-	100	-	-	-	-	-	100	-	-	-	100	-	-	-	-	-
1102-64	2	-	-	-	-	-	-	-	-	-	-	-	-	-	-	-	-	-	-	-	-	-	-	-	-	-	-	-	-	-	-	-	-	-	-	-	-	-	-	-	-	-	-	-	-	-	-	-	-
1102-65	4	-	-	-	-	-	-	-	-	-	-	-	-	100	-	-	100	-	-	-	-	-	-	-	-	-	-	-	-	-	-	-	-	100	-	-	-	-	-	-	-	-	-	-	-	-	-	-	-
1102-66	16	-	100	-	100	-	-	100	-	100	-	-	-	-	-	100	-	-	-	-	-	-	-	-	-	-	-	-	-	-	-	-	-	100	-	-	96.79	-	-	100	-	-	-	100	-	-	-	-	-
1102-69	16	-	-	-	100	-	-	-	-	100	-	-	-	100	100	100	100	100	-	-	-	-	-	-	-	-	-	-	-	-	-	-	100	-	-	-	-	-	-	100	-	-	-	-	100	-	-	-	-
1102-70	13	-	100	-	-	100	-	-	-	-	-	-	-	100	-	-	100	-	100	-	-	-	-	-	-	-	-	-	-	-	-	-	-	100	-	-	-	-	-	-	-	-	-	-	-	-	100	-	-
1102-73	3	-	-	-	-	-	-	-	-	-	-	100	-	-	-	-	-	-	-	-	-	-	-	-	-	-	-	-	-	-	-	-	-	100	-	-	-	-	-	-	-	-	-	-	-	100	-	-	-
1102-76	1	-	-	-	-	-	-	-	-	-	-	-	-	-	-	-	-	-	-	-	-	-	-	-	-	-	-	-	-	-	-	-	-	-	-	-	-	-	-	-	-	-	-	-	-	-	-	-	-
1102-79	9	-	-	-	-	-	-	-	-	-	-	-	-	100	-	-	100	-	-	-	-	-	-	-	-	-	-	-	-	-	-	-	-	100	-	-	-	-	-	-	-	-	-	-	100	-	-	-	-
1102-8	4	-	-	-	-	-	-	-	-	-	-	-	-	100	-	-	100	-	-	-	-	-	-	-	-	-	-	-	-	-	-	-	-	-	-	-	-	-	-	-	-	-	-	-	-	-	-	-	-
1102-80	11	-	-	-	-	100	-	-	100	-	-	-	-	100	-	-	100	-	100	-	-	-	-	-	-	-	-	-	-	-	-	-	-	100	-	-	-	-	-	-	-	-	-	-	-	-	100	-	-
1102-82	15	-	-	-	100	100	-	-	-	-	-	-	-	-	100	100	-	-	100	-	-	-	-	-	-	-	-	-	-	-	-	100	-	-	-	-	96.79	-	100	-	-	-	-	100	-	-	-	-	-
1102-83	3	-	-	-	-	-	-	-	-	-	-	100	-	-	-	-	-	-	-	-	-	-	-	-	-	-	-	-	-	-	-	-	-	100	-	-	-	-	-	-	-	-	-	-	-	100	-	-	-
1102-84	0	-	-	-	-	-	-	-	-	-	-	-	-	-	-	-	-	-	-	-	-	-	-	-	-	-	-	-	-	-	-	-	-	-	-	-	-	-	-	-	-	-	-	-	-	-	-	-	-
1102-86	7	-	-	-	-	-	-	-	-	-	-	-	-	100	-	-	100	-	-	-	-	-	-	-	-	-	-	-	-	-	-	-	-	100	-	-	-	-	-	-	-	-	-	-	-	-	-	-	-
1102-88	5	-	-	-	-	-	-	-	-	-	-	-	-	100	-	-	100	-	-	-	-	-	-	-	-	-	-	-	-	-	-	-	-	100	-	-	-	-	-	-	-	-	-	-	-	-	-	-	-
1102-9	5	-	-	-	-	-	-	-	-	-	-	-	-	100	-	-	100	-	-	-	-	-	-	-	-	-	-	-	-	-	-	-	-	100	-	-	-	-	-	-	-	-	-	-	-	-	-	-	-
1102-90	9	-	-	-	-	-	-	-	-	100	-	-	-	-	-	-	-	-	-	-	-	-	-	-	-	-	-	-	-	-	-	-	-	100	-	-	-	-	-	-	-	-	-	100	-	-	-	-	-
1102-91	4	-	-	-	-	-	-	-	-	-	-	-	-	100	-	-	100	-	-	-	-	-	-	-	-	-	-	-	-	-	-	-	-	100	-	-	-	-	-	-	-	-	-	-	-	-	-	-	-
1102-92	11	-	-	-	-	-	-	100	-	-	-	-	-	100	-	-	100	100	-	-	-	-	-	-	100	-	-	-	-	-	-	-	100	-	-	-	-	-	-	-	100	-	-	-	100	-	-	-	-
1102-95	5	-	-	-	-	-	-	-	-	-	-	-	-	100	-	-	100	-	-	-	-	-	-	-	-	-	-	-	-	-	-	-	-	100	-	-	-	-	-	-	-	-	-	-	-	-	-	-	-
1102-96	12	-	-	-	-	-	-	100	-	100	-	-	-	-	-	-	-	-	-	-	-	-	-	-	-	-	-	-	-	-	-	-	-	100	-	-	-	-	-	100	-	-	-	100	-	-	-	-	-
1102-97	4	-	-	-	-	-	-	-	-	-	-	-	-	100	-	-	100	-	-	-	-	-	-	-	-	-	-	-	-	-	-	-	-	-	-	-	-	-	-	-	-	-	-	-	-	-	-	-	-
1103-13	12	-	-	-	-	100	-	-	100	-	-	-	-	100	-	-	100	-	100	-	-	-	-	-	-	-	-	-	-	-	-	-	-	100	-	-	-	-	-	-	-	-	-	-	-	-	100	-	-
1103-14	5	-	-	-	-	-	-	-	-	-	-	-	-	100	-	-	100	-	-	-	-	-	-	-	-	-	-	-	-	-	-	-	-	100	-	-	-	-	-	-	-	-	-	-	-	-	-	-	-
1103-15	5	-	-	-	-	-	-	-	-	-	-	-	-	-	-	-	-	-	-	-	-	-	-	-	-	-	-	-	-	-	-	-	-	100	-	-	-	-	-	-	-	-	-	-	-	-	-	-	-
1103-16	4	-	-	-	-	-	-	-	-	-	-	-	-	100	-	-	100	-	-	-	-	-	-	-	-	-	-	-	-	-	-	-	-	-	-	-	-	-	-	-	-	-	-	-	-	-	-	-	-
1103-17	10	-	-	-	-	-	-	100	-	100	-	-	-	-	-	-	-	-	-	-	-	-	-	-	-	-	-	-	-	-	-	-	-	100	-	-	-	-	-	100	-	-	-	100	-	-	-	-	-
1103-19	11	-	-	-	-	-	-	100	-	100	-	-	-	-	-	-	-	-	-	-	-	-	-	-	-	-	-	-	-	-	-	-	-	100	-	-	-	-	-	100	-	-	-	100	-	-	-	-	-
1103-2	11	-	-	-	-	100	-	-	100	-	-	-	-	100	-	-	100	-	100	-	-	-	-	-	-	-	-	-	-	-	-	-	-	100	-	-	-	-	-	-	-	-	-	-	-	-	100	-	-
1103-21	11	-	-	-	-	-	-	100	-	100	-	-	-	-	-	-	-	-	-	-	-	-	-	-	-	-	-	-	-	-	-	-	-	100	-	-	-	-	-	100	-	-	-	100	-	-	-	-	-
1103-22	7	-	-	-	-	-	-	-	-	-	-	-	-	100	-	-	100	-	-	-	-	-	100	-	-	-	-	-	-	-	-	-	-	100	-	-	-	-	-	-	-	-	-	-	-	-	-	-	-
1103-24	5	-	-	-	-	-	-	-	-	-	-	-	-	100	-	-	100	-	-	-	-	-	-	-	-	-	-	-	-	-	-	-	-	100	-	-	-	-	-	-	-	-	-	-	-	-	-	-	-
1103-25	8	-	-	-	-	-	-	-	-	-	-	-	-	100	-	-	100	-	-	-	-	-	-	-	-	-	-	-	-	-	-	-	-	100	-	-	-	-	-	-	-	-	-	-	100	-	-	-	-
1103-26	2	-	-	-	-	-	-	-	-	-	-	-	-	-	-	-	-	-	-	-	-	-	-	-	-	100	-	-	-	-	-	-	-	-	-	-	-	100	-	-	-	-	-	-	-	-	-	-	-
1103-29	9	-	-	-	-	-	-	100	-	100	-	-	-	-	-	-	-	-	-	-	100	-	-	-	-	-	-	-	-	-	-	-	-	-	-	-	-	-	-	100	-	-	-	100	-	-	-	-	-
1103-3	7	-	-	-	-	-	-	-	-	-	-	-	-	-	-	-	-	-	-	-	-	-	-	-	-	-	-	-	-	-	-	-	-	-	-	-	-	-	-	-	-	-	-	-	-	-	-	-	-
1103-31	5	-	-	-	-	-	-	-	-	-	-	-	-	100	-	-	100	-	-	-	-	-	-	-	-	-	-	-	-	-	-	-	-	100	-	-	-	-	-	-	-	-	-	-	-	-	-	-	-
1103-33	5	-	-	-	-	-	-	-	-	-	-	-	-	100	-	-	100	-	-	-	-	-	-	-	-	-	-	-	-	-	-	-	-	100	-	-	-	-	-	-	-	-	-	-	-	-	-	-	-
1103-40	13	-	-	-	-	-	100	100	-	-	-	-	-	100	-	-	100	-	-	-	100	-	-	-	-	-	-	-	-	-	-	-	100	-	-	-	-	-	-	-	-	-	-	-	100	-	-	-	-
1103-41	11	-	-	-	-	-	-	100	-	100	-	-	-	-	-	-	-	-	-	-	-	-	-	-	-	-	-	-	-	-	-	-	-	100	-	-	-	-	-	100	-	-	-	100	-	-	-	-	-
1103-47	16	-	-	-	100	-	-	-	-	100	-	-	-	100	100	100	100	100	-	-	-	-	-	-	-	-	-	-	-	-	-	-	100	-	-	-	-	-	-	100	-	-	-	-	100	-	-	-	-
1103-5	5	-	-	-	-	-	-	-	-	-	-	-	-	100	-	-	100	-	-	-	-	-	-	-	-	-	-	-	-	-	-	-	-	100	-	-	-	-	-	-	-	-	-	-	-	-	-	-	-
1103-52	11	-	-	-	-	100	-	-	100	-	-	-	-	100	-	-	100	-	100	-	-	-	-	-	-	-	-	-	-	-	-	-	-	100	-	-	-	-	-	-	-	-	-	-	-	-	100	-	-
1103-54	11	-	-	-	-	-	-	100	-	100	-	-	-	-	-	-	-	-	-	-	-	-	-	-	-	-	-	-	-	-	-	-	-	100	-	-	-	-	-	100	-	-	-	100	-	-	-	-	-
1103-56	10	-	-	-	-	-	-	100	-	100	-	-	-	-	-	-	-	-	-	-	-	-	-	-	-	-	-	-	-	-	-	-	-	100	-	-	-	-	-	100	-	-	-	100	-	-	-	-	-
1103-57	12	-	-	-	-	-	-	100	-	100	-	-	-	-	-	-	-	-	-	-	-	-	-	-	-	-	-	-	-	-	-	-	-	100	-	-	-	-	-	100	-	-	-	100	-	-	-	-	-
1103-58	11	-	-	-	-	-	-	100	-	100	-	-	-	-	-	-	-	-	-	-	-	-	-	-	-	-	-	-	-	-	-	-	-	100	-	-	-	-	-	100	-	-	-	100	-	-	-	-	-
1103-61	5	-	-	-	-	-	-	-	-	-	-	-	-	100	-	-	100	-	-	-	-	-	-	-	-	-	-	-	-	-	-	-	-	100	-	-	-	-	-	-	-	-	-	-	-	-	-	-	-
1103-66	8	-	-	-	-	-	-	-	-	-	-	-	-	100	-	-	100	-	-	-	-	-	-	-	-	-	-	-	-	-	-	-	-	100	-	-	-	-	-	-	-	-	-	-	100	-	-	-	-
1103-7	9	-	-	-	-	-	-	100	-	100	-	-	-	-	-	-	-	-	-	-	100	-	-	-	-	-	-	-	-	-	-	-	-	-	-	-	-	-	-	100	-	-	-	100	-	-	-	-	-
1103-70	5	-	-	-	-	-	-	-	-	-	-	-	-	100	-	-	100	-	-	-	-	-	-	-	-	-	-	-	-	-	-	-	-	100	-	-	-	-	-	-	-	-	-	-	-	-	-	-	-
1103-72	11	-	-	-	-	-	-	100	-	100	-	-	-	-	-	-	-	-	-	-	-	-	-	-	-	-	-	-	-	-	-	-	-	100	-	-	-	-	-	100	-	-	-	100	-	-	-	-	-
1103-74	4	-	-	-	-	-	-	-	-	-	-	-	-	100	-	-	100	-	-	-	-	-	-	-	-	-	-	-	-	-	-	-	-	-	-	-	-	-	-	-	-	-	-	-	-	-	-	-	-
1103-77	12	-	-	-	-	-	-	100	-	100	-	-	-	-	-	-	-	-	-	-	-	-	-	-	-	-	-	-	-	-	-	-	-	100	-	-	-	-	-	100	-	-	-	100	-	-	-	-	-
1103-79	5	-	-	-	-	-	-	-	-	-	-	-	-	100	-	-	100	-	-	-	-	-	-	-	-	-	-	-	-	-	-	-	-	100	-	-	-	-	-	-	-	-	-	-	-	-	-	-	-
1103-8	5	-	-	-	-	-	-	-	-	-	-	-	-	100	-	-	100	-	-	-	-	-	-	-	-	-	-	-	-	-	-	-	-	100	-	-	-	-	-	-	-	-	-	-	-	-	-	-	-
1103-80	5	-	-	-	-	-	-	-	-	-	-	-	-	100	-	-	100	-	-	-	-	-	-	-	-	-	-	-	-	-	-	-	-	100	-	-	-	-	-	-	-	-	-	-	-	-	-	-	-
1103-81	12	-	-	-	-	100	-	-	100	-	-	-	-	100	-	-	100	-	100	-	-	-	-	-	-	-	-	-	-	-	-	-	-	100	-	-	-	-	-	-	-	-	-	-	-	-	100	-	-
1103-83	0	-	-	-	-	-	-	-	-	-	-	-	-	-	-	-	-	-	-	-	-	-	-	-	-	-	-	-	-	-	-	-	-	-	-	-	-	-	-	-	-	-	-	-	-	-	-	-	-
1103-9	5	-	-	-	-	-	-	-	-	-	-	-	-	100	-	-	100	-	-	-	-	-	-	-	-	-	-	-	-	-	-	-	-	100	-	-	-	-	-	-	-	-	-	-	-	-	-	-	-
1103-95	0	-	-	-	-	-	-	-	-	-	-	-	-	-	-	-	-	-	-	-	-	-	-	-	-	-	-	-	-	-	-	-	-	-	-	-	-	-	-	-	-	-	-	-	-	-	-	-	-
1103-96	4	-	-	-	-	-	-	-	-	-	-	-	-	100	-	-	100	-	-	-	-	-	-	-	-	-	-	-	-	-	-	-	-	-	-	-	-	-	-	-	-	-	-	-	-	-	-	-	-
1103-97	17	-	-	-	100	-	-	-	-	100	-	-	-	100	100	100	100	100	-	-	-	-	-	-	-	-	-	-	-	-	-	-	100	100	-	-	-	-	-	-	-	100	-	-	100	-	-	-	-
1103-98	11	-	-	-	100	-	-	-	-	-	100	-	-	100	100	100	100	-	-	-	-	-	-	-	-	-	-	-	-	-	-	-	-	-	-	-	-	-	-	-	-	-	-	-	-	-	-	-	-
1103-99	5	-	-	-	-	-	-	-	-	-	-	-	-	100	-	-	100	-	-	-	-	-	-	-	-	-	-	-	-	-	-	-	-	100	-	-	-	-	-	-	-	-	-	-	-	-	-	-	-
1104-1	5	-	-	-	-	-	-	-	-	-	-	-	-	100	-	-	100	-	-	-	-	-	-	-	-	-	-	-	-	-	-	-	-	100	-	-	-	-	-	-	-	-	-	-	-	-	-	-	-
1104-13	4	-	-	-	-	-	-	100	-	-	-	-	-	-	-	-	-	-	-	-	-	-	-	-	-	-	-	-	-	-	-	-	-	-	-	-	-	-	-	92.38	-	-	-	-	-	-	-	-	-
1104-14	11	-	-	-	-	-	-	100	-	100	-	-	-	-	-	-	-	-	-	-	-	-	-	-	-	-	-	-	-	-	-	-	-	100	-	-	-	-	-	100	-	-	-	100	-	-	-	-	-
1104-16	5	-	-	-	-	-	-	-	-	-	-	-	-	100	-	-	100	-	-	-	-	-	-	-	-	-	-	-	-	-	-	-	-	100	-	-	-	-	-	-	-	-	-	-	-	-	-	-	-
1104-19	5	-	-	-	-	-	-	-	-	-	-	-	-	100	-	-	100	-	-	-	-	-	-	-	-	-	-	-	-	-	-	-	-	100	-	-	-	-	-	-	-	-	-	-	-	-	-	-	-
1104-2	5	-	-	-	-	-	-	-	-	-	-	-	-	100	-	-	100	-	-	-	-	-	-	-	-	-	-	-	-	-	-	-	-	100	-	-	-	-	-	-	-	-	-	-	-	-	-	-	-
1104-24	11	-	-	-	-	-	-	100	-	100	-	-	-	-	-	-	-	-	-	-	-	-	-	-	-	-	-	-	-	-	-	-	-	100	-	-	-	-	-	100	-	-	-	100	-	-	-	-	-
1104-25	7	-	-	-	-	-	-	-	-	100	-	-	-	100	-	-	100	-	-	-	-	-	-	-	-	-	-	-	-	-	-	-	-	100	-	-	-	-	-	-	-	-	-	-	-	-	-	-	-
1104-3	11	-	-	-	100	-	-	-	-	-	100	-	-	100	100	100	100	-	-	-	-	-	-	-	-	-	-	-	-	-	-	-	-	-	-	-	-	-	-	-	-	-	-	-	-	-	-	-	-
1104-31	16	-	-	-	100	-	-	100	-	-	-	-	-	100	100	100	100	100	-	-	-	-	-	-	-	-	-	-	-	-	-	-	100	100	-	-	-	-	-	-	100	-	-	-	100	-	-	-	-
1104-4	11	-	-	-	-	-	-	100	-	100	-	-	-	-	-	-	-	-	-	-	-	-	-	-	-	-	-	-	-	-	-	-	-	100	-	-	-	-	-	100	-	-	-	100	-	-	-	-	-
1104-6	11	-	-	-	100	-	-	-	-	-	100	-	-	100	100	100	100	-	-	-	-	-	-	-	-	-	-	-	-	-	-	-	-	-	-	-	-	-	-	-	-	-	-	-	-	-	-	-	-
1104-7	5	-	-	-	-	-	-	-	-	-	-	-	-	100	-	-	100	-	-	-	-	-	-	-	-	-	-	-	-	-	-	-	-	100	-	-	-	-	-	-	-	-	-	-	-	-	-	-	-
816-100	11	-	-	-	-	-	-	100	-	100	-	-	-	-	-	-	-	-	-	-	-	-	-	-	-	-	-	-	-	-	-	-	-	100	-	-	-	-	-	100	-	-	-	100	-	-	-	-	-
816-91	14	-	-	-	100	-	-	-	-	-	-	-	-	100	100	100	100	100	-	-	-	-	-	-	100	-	-	-	-	-	-	-	100	-	-	-	-	-	-	-	100	-	-	-	100	-	-	-	-
816-99	5	-	-	-	-	-	-	-	-	-	-	-	-	100	-	-	100	-	-	-	-	-	-	-	-	-	-	-	-	-	-	-	-	100	-	-	-	-	-	-	-	-	-	-	-	-	-	-	-
817-6	5	-	-	-	-	-	-	-	-	-	-	-	-	100	-	-	100	-	-	-	-	-	-	-	-	-	-	-	-	-	-	-	-	100	-	-	-	-	-	-	-	-	-	-	-	-	-	-	-
817-7	22	-	-	-	100	-	-	-	-	100	-	-	-	100	100	100	100	100	-	-	-	-	-	-	100	-	-	-	-	-	100	-	100	-	-	100	-	-	-	-	100	-	-	-	100	-	-	-	100
[truncated: 21 more columns]

## Sheet: Excel S3
Excel S3. Serotypes, subtypes and β-Lactamase resistance genes of ceftriaxone-resistant strains.
Strain No.	Serotype	Subtype	blaCMY-2	blaCTX-M-14	blaCTX-M-55	blaCTX-M-64	blaCTX-M-65	blaEC-18	blaLAP-2	blaMIR-11	blaOXA-10	blaTEM-1	bleO
1101-12	S. Typhimurium	novel ST	-	-	-	100	-	-	-	-	-	-	-
1101-19	S. 1,4,[5],12:i:-	ST34	-	-	-	-	100	-	-	-	100	-	-
1101-33	S. 1,4,[5],12:i:-	ST34	-	-	100	-	-	-	-	-	-	100	-
1101-71	S. 1,4,[5],12:i:-	ST34	-	-	-	-	100	-	-	-	100	-	-
1101-77	S. 1,4,[5],12:i:-	ST34	-	-	100	-	-	-	-	-	-	100	-
1101-84	S. Typhimurium	ST19	100	-	-	-	-	-	-	-	-	100	-
1101-88	S. 1,4,[5],12:i:-	ST34	-	-	100	-	-	100	-	95.9	-	86.06	-
1102-13	S. 1,4,[5],12:i:-	ST34	100	-	-	-	-	-	-	-	100	-	-
1102-39	S. 1,4,[5],12:i:-	ST34	-	100	-	-	-	-	-	-	-	-	96.79
1102-44	S. Typhimurium	ST19	100	-	-	-	-	-	-	-	-	100	-
1102-57	S. 1,4,[5],12:i:-	ST34	-	-	100	-	-	-	100	-	-	100	-
1102-92	S. 1,4,[5],12:i:-	ST34	-	-	-	-	100	-	-	-	100	-	-
1103-22	S. 1,4,[5],12:i:-	ST34	-	-	100	-	-	-	-	-	-	100	-
1103-29	S. Typhimurium	ST19	100	-	-	-	-	-	-	-	-	-	-
1103-40	S. 1,4,[5],12:i:-	ST34	100	-	-	-	-	-	-	-	100	-	-
1103-7	S. Typhimurium	ST19	100	-	-	-	-	-	-	-	-	-	-
816-91	S. 1,4,[5],12:i:-	ST34	-	-	-	-	100	-	-	-	100	-	-
